1           A Poisson binomial based statistical testing framework for  
2           comprehensive comorbidity discovery across massive Electronic  
3                           Health Record datasets

4  
5   Gordon Lemmon<sup>1,2</sup>, Sergiusz Wesolowski<sup>1,2</sup>, Alex Henrie<sup>1,2</sup>, Martin Tristani-Firouzi<sup>3,4</sup>,  
6   Mark Yandell<sup>1,2</sup>

7  
8   <sup>1</sup>Department of Human Genetics, University of Utah, Salt Lake City, UT, USA;

9   <sup>2</sup>Utah Center for Genetic Discovery & Department of Human Genetics, University of  
10   Utah, Salt Lake City, UT, USA

11   <sup>3</sup>Division of Pediatric Cardiology, University of Utah School of Medicine, Salt Lake City,  
12   UT, USA;

13   <sup>4</sup>Nora Eccles Harrison CVRTI, University of Utah School of Medicine, Salt Lake City,  
14   UT, USA;

15  
16   \*Corresponding Authors: [Martin.Tristani@utah.edu](mailto:Martin.Tristani@utah.edu), [myandell@genetics.utah.edu](mailto:myandell@genetics.utah.edu)

17

## 18 Abstract

19 Discovery of comorbidities (the concomitant occurrence of distinct medical conditions in  
20 the same patient) is a prerequisite for creating forecasting tools for downstream outcomes  
21 research. Current comorbidity discovery applications are designed for small datasets and  
22 use stratification to control for confounding variables such as age, sex, or ancestry.  
23 Stratification lowers false positive rates, but reduces power, as the size of the study cohort  
24 is decreased. Here, we describe a Poisson Binomial based approach to comorbidity  
25 discovery (PBC) designed for big-data applications that circumvents the need for  
26 stratification. PBC adjusts for confounding demographic variables on a per-patient basis,  
27 and models temporal relationships. We benchmark PBC using two datasets, the publicly  
28 available MIMIC-IV; and the entire Electronic Health Record (EHR) corpus of the  
29 University of Utah Hospital System, encompassing over 1.6 million patients, to compute  
30 comorbidity statistics on 4,623,841 pairs of potentially comorbid medical terms. The  
31 results of this computation are provided as a searchable web resource. Compared to  
32 current methods, the PBC approach reduces false positive associations, while retaining  
33 statistical power to discover true comorbidities.

## 34 Introduction

35 Comorbidity refers to the concomitant occurrence of distinct medical conditions in the  
36 same patient<sup>1</sup>. Comorbidities can occur together, or sequentially across the patient's  
37 medical history. Exploring these temporal connections offers additional insight into  
38 disease progression and disease associations, and promises improved predictive tools  
39 for evidence-based medicine<sup>2-5</sup>. Traditionally, comorbidities have been discovered

40 manually, through human chart review, literature search, and clinical knowledge<sup>6</sup>. For  
41 example, the authors of the Charlson comorbidity index<sup>7</sup> selected comorbid diagnoses  
42 based on manual chart review for a 559-patient cohort. Likewise, the well-known  
43 Elixhauser Comorbidity index, was compiled through review of published studies  
44 identifying comorbid conditions<sup>8</sup>.

45 Large collections of Electronic Health Records (EHRs) present promising new  
46 opportunities for comorbidity discovery. However, manual review of millions of EHR  
47 records in search of comorbidities is infeasible, and *ab initio* means for discovery and  
48 temporal ordering of comorbidities using large collections of EHRs is an area ripe for  
49 innovation. Current computational approaches to *ab initio* comorbidity discovery use  
50 statistics such as risk ratio, odds ratio, comorbidity-score<sup>9</sup>, propensity score or  $\phi$ -  
51 correlation to measure effect size. P-values are obtained using Fisher's exact test (or  
52 hypergeometric),  $\chi^2$  test, or binomial test<sup>10-14</sup>. All of these approaches rely on an  
53 assumption that each member of the population has a disease probability equal to the  
54 population incidence rate. Confounding variables such as age and sex are controlled for  
55 by sub-setting the data, a process termed *stratification*, or alternatively through use of  
56 matched case-control cohorts<sup>14,15</sup>. Both of these approaches control for confounders, but  
57 at the expense of statistical power, because they necessarily reduce sample size. One  
58 approach to overcoming this intrinsic limitation is to aggregate massive collections of  
59 EHRs, but as we show, even millions of records are too few to explore comorbidities  
60 associated with rare diseases when controlling for multiple confounding variables.

61 PBC models the effects of confounding variables, allowing every sample to be  
62 personalized, resulting in improved statistical power compared to stratification. Briefly,

63 PBC uses logistic regression to model how each patient's demographics impact his or  
64 her probability of having a medical term. These personalized probabilities are then used  
65 to calculate pairwise expectations and p-values under the Poisson binomial distribution,  
66 rather than the hypergeometric and binomial distributions that are used for Fisher's exact  
67 test, and the  $\chi^2$  test, respectively. Moreover, with minor modification, this approach can  
68 also be used to temporally order comorbidities and to determine the significance of  
69 directionalities. As we demonstrate, use of the Poisson binomial is a significant  
70 advantage, because it obviates the need for stratification. The result is increased power  
71 for discovery, which we leverage to explore the relationships among diagnoses, medical  
72 procedures and medications.

73 Alongside the need for improved statistical methods, tools are also needed to browse,  
74 search, and visualize the network of comorbid medical terms discovered in big-data  
75 applications. In a manner similar to *Siggaard et al.*<sup>14</sup>, we provide a browser-based query  
76 engine for navigating these comorbidities and their temporal relationships within the  
77 University of Utah Hospitals system [[https://pbc.genetics.utah.edu/lemmon2021/pbc-  
78 utah](https://pbc.genetics.utah.edu/lemmon2021/pbc-utah)].

79 In what follows, we describe PBC, explore its behavior, and benchmark its performance  
80 using the contents of the University of Utah Health system, and the publicly available  
81 MIMIC-IV dataset<sup>16</sup>. For brevity's sake, we will refer to co-occurring medical diagnoses,  
82 procedures and medications using the single blanket term, comorbidity. We demonstrate  
83 how PBC can be used to transform massive EHR datasets into a temporal dependency  
84 graph for large-scale *ab initio* discovery of comorbid relationships and investigations of  
85 disease progressions.

## 86 Results

### 87 *Modeling the effects of confounders using logistic regression*

88 We collected records for 1.6 million patients, encompassing 50 million visits and 150  
89 million diagnosis (DX), procedure (PX) and medication (RX) codes from the University of  
90 Utah Electronic Data Warehouse (EDW). For the proof of principle analyses presented  
91 here, diagnoses were converted from ICD9<sup>17</sup> and ICD10<sup>18</sup> diagnosis codes to Clinical  
92 Classification System<sup>19</sup> (CCS) multi-level diagnosis codes. CPT<sup>20</sup> provider billing codes  
93 were converted to CCS multi-level procedure codes. We include both leaf nodes and  
94 internal nodes so that the researcher can discover more specific comorbidities (e.g “CCS  
95 2.1.1: cancer of colon”) as well as more general comorbidities (e.g. “CCS 2.1: colorectal  
96 cancer” or “CCS 2: neoplasms”). Medications were coded using RxNorm concept unique  
97 identifiers (CUIs)<sup>21</sup>. This procedure reduced the number of distinct medical terms to 1007  
98 DX, 259 PX and 1775 RX codes. We also collected demographic information, including  
99 sex, race, ethnicity, insurance class, age and length of medical records.

100 A logistic regression model (LRM) was determined for each DX, PX and RX term. The  
101 LRM includes demographic information for each patient (age, gender, ancestry, ethnicity,  
102 insurance type) and EHR exposure (the length and density of a person’s medical record).  
103 Since medical terms are included or excluded from year to year, and coding practices  
104 vary over time, we also include the date of the patient’s last visit as a control for this effect.  
105 The complete list of features is described in **Table S1** and **Figure S1**. The response  
106 variable is whether each patient has the term in their medical record. Note that we do not  
107 model recurrence - in this analysis we consider only the first instance of a term in a

108 patient's medical history. We use these LRMs to estimate for each medical term, each  
109 patient's *a priori* personalized probability of having that term in their medical record.

110 We used a regularized regression model under the assumption of collinearity in the  
111 confounding features. However, there is no requirement for such an assumption; for  
112 example, Neural networks could be used in place of LRM, so as to better capture  
113 nonlinear relationships between variables. L1 and L2 penalized logistic regression include  
114 a value  $C$  that prevents overfitting by penalizing large coefficients. Smaller  $C$ -values  
115 specify stronger regularization (e.g., stronger prevention of over-fitting). To determine the  
116 optimal  $C$ -value for each LRM, it was necessary to choose a score function for LRM  
117 evaluation. We experimented with a number of standard and custom score functions as  
118 described in supplemental "Math.pdf". We optimize  $C$  for each LRM using stratified 3-fold  
119 cross validation. Grid search is used to evaluate  $C$ -values in the set  $\{10^{-14}, 10^{-13}, 10^{-12},$   
120  $\dots, 10^{12}, 10^{13}, 10^{14}\}$ . **Figure S2** top panel shows boxplots of the scores reported by each  
121 of these score functions. We use entropy as a measure of the ability of a score function  
122 to differentiate model quality. From those score functions achieving high entropy, we  
123 evaluate the distribution of  $C$ -values (**Figure S2** bottom panel). We choose  $J_{cutoff}$  for all  
124 downstream analysis because it includes fewer outliers than the other methods  
125 examined.  $J_{cutoff}$  is based on Youden's  $J$  statistic<sup>22</sup>, only rather than a 50% probability  
126 threshold, the classification threshold is determined empirically so that the total number  
127 of predicted positives is equal to the actual count of positives.

128 We train LRMs using stratified 3-fold cross validation, evaluated using  $J_{cutoff}$ . Under L1  
129 penalized logistic regression, model features can be unselected by setting their  
130 coefficients to zero. **Figure 1** summarizes how often each demographic feature is

131 included in the trained LRMs. Age at last visit, number of visits, number of terms, and  
132 length of medical record were grouped together as “EHR exposure”. Patients may be  
133 seen at a non-university clinic, may move in or out of the state over the years, or may  
134 have differing proclivities toward visiting the doctor. EHR exposure is an attempt to control  
135 for these effects. As **Figure 1** makes clear, EHR exposure is always important in  
136 predicting whether a patient has a particular medical term.

137 ***PBC retains power as features are added and as sample sizes are reduced***

138 The binomial distribution models the discrete probability of the number of successes in N  
139 independent experiments each with probability P. A naïve approach to comorbidity  
140 analysis assumes the probability of seeing term 1 and term 2 ( $P_{t_1,t_2}$ ) in a medical record  
141 is the product of the population incidence rates for terms 1 and 2. Knowing the number of  
142 patients with both terms 1 and 2 in their medical record, one can calculate a comorbidity  
143 p-value using the binomial test of statistical significance. However, because this method  
144 does not adjust for demographic factors, the p-values they generate can be driven by  
145 effects such as age and sex. Thus, a common approach in comorbidity literature is to  
146 stratify the population by age and sex, and then calculate the binomial p-value for each  
147 stratum<sup>7</sup>. In contrast, the PBC approach uses the Poisson binomial distribution to  
148 calculate p-values for each term pair. The Poisson binomial distribution is a generalization  
149 of the binomial distribution in which every trial/sample (i.e., patient) has a different  
150 probability of “success” (i.e., having both terms in their medical record). The probability of  
151 an individual patient having both terms in their medical record is calculated as the product  
152 of per-patient per-term probabilities generated from corresponding LRMs described  
153 above.

154 **Figure 2** explores the relationships between comorbidities discovered by PBC versus  
155 stratification as a function of increasing numbers of demographic features. As can be  
156 seen, the stratification approach rapidly loses power as more criteria are added to the  
157 stratum filter. In contrast, by modeling demographic features, PBC maintains power.

158 **Table 1** compares the power of stratification and PBC to detect three well known  
159 comorbidities using our EHR corpus. As in **Figure 2**, we compare the p-values generated  
160 by sequentially adding confounding variables. Notice how stratification dramatically  
161 lowers the strength of p-values as a function of the size of the stratum. This same behavior  
162 is illustrated globally in **Figure 2**. Even with millions of EHRs, controlling for more than a  
163 few confounding demographic variables leads to strata that are too small to achieve  
164 statistical significance. By modeling the effects of multiple confounding variables, PBC  
165 retains statistical power to identify comorbidities.

166 **Table S3** presents five well known comorbidities of breast cancer<sup>23–28</sup>. Stratification by  
167 age and gender deflates the strength of all p-values, and as a result they fall below the  
168 Bonferroni corrected significance threshold (**Table S3** column “binomial female 50-59”).  
169 In contrast, by explicitly modeling age, gender, race, ethnicity, insurance type, and EHR  
170 exposure, PBC retains power to capture these true positive associations.

171 The complete set of comorbid term pairs discovered by PBC can be visualized using  
172 network analysis. In supplemental **Figure S3**, we use the minimum description length  
173 algorithm<sup>29</sup> to perform clustering of pairwise comorbidities by p-value strength. Terms with  
174 similar patterns of comorbidities are closer together in the network. To illustrate this, we  
175 annotated selected comorbidities discovered within each cluster. A literature search



176 confirmed that these labeled comorbidities represent existing clinical knowledge (see  
177 corresponding citations in **Table S7**). **Figure S3** provided the motivation to produce an  
178 interactive tool for querying, exploring and extracting information from the comorbidity  
179 network. In order to provide better means to navigate this complex network we developed  
180 a browser-based tool for exploration of comorbidities, discussed below.

### 181 ***PBC identifies comorbidities unique to underrepresented minority groups***

182 PBC can also capture true comorbidities hidden within mixed populations. For instance,  
183 consider Sickle Cell Anemia, a disease that affects 1 in 365 African American newborns  
184 and 1 in 100,000 newborn Caucasians in the United States<sup>30</sup>. Malaise and fatigue, while  
185 common to many disorders, are among the most common symptoms of Sickle Cell  
186 Anemia (SCA)<sup>31–33</sup>, and usually manifest in an age dependent manner. **Table 2** compares  
187 five comorbidity p-values. Row 1 presents p-values calculated using all data. While the  
188 true comorbidity is discovered, we cannot say with certainty if the relationship is a true  
189 comorbidity or simply driven by a third confounding variable (e.g. ancestry). The following  
190 rows present X2 p-values after stratifying by ancestry, ethnicity, gender, and age and  
191 PBC p-values after including these same features in the regression model. Stratification  
192 fails to find a significant comorbidity between SCA and malaise/fatigue once the data is  
193 partitioned by ancestry. The rarity of Sickle Cell disease in Caucasians and the small  
194 sample size for African Americans within Utah's EHR corpus make detection of this  
195 comorbidity difficult. PBC, in contrast, discovers the comorbidity. In fact, the additions of  
196 ancestry, ethnicity, and age each increase the strength of the association between SCA  
197 and malaise/fatigue.

## 198 ***Application of PBC to a publicly available dataset***

199 Because the University of Utah data used in this study cannot be shared publicly, as it  
200 includes protected health information (PHI), we also demonstrated the general  
201 applicability of PBC by applying it on the publicly available MIMIC-IV dataset<sup>16</sup>. This  
202 dataset includes 248,714 patients with associated ICD10 diagnosis or procedure codes.  
203 A total of 5,363,338 ICD9 and ICD10 diagnosis and procedure codes were converted to  
204 multi-level CCS codes. These include 725 distinct CCS diagnosis codes and 395 distinct  
205 CCS procedure codes. We repeated our experiments on this dataset, training a logistic  
206 regression model for each diagnosis and procedure code, and calculating comorbidities  
207 using the Poisson binomial distribution. Although the MIMIC-IV data is missing much of  
208 the detail available in the University of Utah dataset, the PBC results generally mirror  
209 those of the Utah dataset (**Figure S4**). Regression features are shown in **Figure S4**, top  
210 panel. In addition, because a random offset is added to each patient's admission dates,  
211 it is not possible to control for the changes in use of various billing codes over time.  
212 Despite these limitations, the deployment of PBC on the MIMIC-IV public dataset further  
213 illustrates how PBC retains statistical power to identify comorbid relationships that are  
214 lost by stratification. Tables 1 and 2 are replicated on MIMIC-IV data as supplemental  
215 tables S4 and S5. Co-occurrence and directional comorbidities discovered within MIMIC-  
216 IV data can be queried at the following link:

217 <https://pbc.genetics.utah.edu/lemmon2021/pbc-mimic>.

218 ***Temporalized P-values allow for understanding of disease progression***

219 The PBC approach can be extended to provide temporalized (or directional) p-values  
220 across pre-specified time windows (see Methods for details). The inclusion of a direction  
221 window is necessary for several reasons. On short time scales, the order of appearance  
222 of diagnostic codes is an unreliable indicator of which condition actually preceded the  
223 other in the patient. The development of underlying disease, the relevant signs and  
224 symptom, the provider arriving at a given diagnosis, and the eventual recording of the  
225 said diagnosis might follow staggered paths that have little or no relevance when viewing  
226 the data in a time-slice of less than 30 days or so, thus for many analyses it is probably  
227 best to treat these events as contemporaneous. However, in some cases a short window  
228 size is optimal for capturing a comorbidity.

229 Consider the following example. PBC reports the following p-values for the  
230 diagnosis/procedure pair amputation of lower extremity → postoperative infection: within  
231 30 days =  $1e-3663$ , greater than 30 days =  $1e-24$ , greater than 90 days =  $1e-6$ , greater  
232 than 365 days = 0.86. It is clear that shorter window sizes better capture the increased  
233 risk of infection after amputation, as one would logically expect. Thus, the window size  
234 must be informed by clinical knowledge and research objectives. In this manuscript, we  
235 examined associations based on a 90-day window. Using our website (see below) a user  
236 can also query additional window sizes (30 days, 365 days and 730 days).

237 **Table S6** presents specific directional associations discovered in an *ab initio* fashion by  
238 PBC and supported by clinical knowledge. For instance, Milrinone is prescribed to  
239 patients awaiting heart transplant<sup>34</sup>. The tendency of type 2 diabetics to develop chronic

240 kidney disease is well known<sup>35,36</sup>. HIV induced immunocompromisation often leads to  
241 pneumocystis<sup>37</sup> and obesity is a known risk factor for hypertension<sup>38</sup>.

### 242 ***A web-based resource for comorbidity research***

243 Among 4,623,841 pairs of medical terms in our collection of 1.6 million EHRs, we  
244 identified 3,311,830 comorbidities co-occurring within a 90-day window, and 1,969,941  
245 temporally directed ones, acting over a time period greater than 90 days. All associations  
246 meet a Bonferroni significance threshold of 1.08e-08. The result is a highly-connected  
247 network of comorbid diagnoses and associated procedures and medications based on  
248 the University of Utah EHR database.

249 In response to the size and complexity of these 'big-data', we have created browser-  
250 based means to navigate, query and explore them  
251 (<https://pbc.genetics.utah.edu/lemmon2021/pbc-utah>). A screenshot highlighting the  
252 functionality of the browser is shown in **Figure 3**. The site allows the user to search for  
253 relationships between any pairwise diagnosis, procedure or medication. The result is a  
254 searchable table of all other DX, PX, and RX codes along with statistics about the  
255 connection to the query term. These statistics include the counts, expectation and p-value  
256 of association after adjusting for confounders shown in **Figure 1**. We use two-sided p-  
257 values, so that "less than expected" associations are also discoverable. For comparison,  
258 we provide both  $\chi^2$  p-values and G-test p-values.

259 In addition to patient lifetime co-occurrence p-values, we provide within window, and out  
260 of window directional p-values with a selectable window size (30, 90, 365, or 730 day).  
261 We also provide statistics on effect size, including relative risk, odds ratio, and "flow rate"

262 which is the percent of patients coded with term 1 who later are coded with term 2. The  
263 “Flowchart” view puts the query term in focus and shows the terms that tend to precede  
264 and follow the query term to the left and right respectively. The user can filter by p-value  
265 strength and by flow rate.

266 A slice of that network is shown in **Figure 3**. This figure contains a “flow chart” view for  
267 essential hypertension. By switching out the central node, an investigator can step  
268 through the temporalized network of diagnoses, procedures and medications. The  
269 investigator can further filter by effect size to find co-occurrences that are both significant  
270 and prevalent.

### 271 ***Comparison with other published comorbidity tools***

272 **Table 3** compares functionalities provided on our comorbidity website with those found in  
273 other published comorbidity discovery tools. To the best of our knowledge, our website is  
274 the only available public resource of its kind that considers the individual risk profile for  
275 each patient having each medical term. Additionally, our approach (and website) captures  
276 inverse comorbidities (terms occurring together less often than expected) and models  
277 temporal relations between pairs of terms.

278 The R package “comoRbidity” was published April 2018<sup>10</sup>. We installed the package, and  
279 reformatted our data to fit the required specifications. Given our input of 150,598,377 CCS  
280 and RxNorm codes, the “comoRbidity” package consumes all available RAM (we used a  
281 Linux server with 504 GB of RAM) and fails to complete. We tried to acquire CytoCom<sup>11</sup>  
282 and comoR<sup>12</sup>, however the corresponding author has indicated that these projects are no  
283 longer maintained nor available for download. The Java package “Comorbidity4j” was

284 published January 2019<sup>13</sup>. We installed Comorbidity4j and attempted to compute on our  
285 full dataset. The application warned against calculating comorbidities for more than  
286 300,000 pairs of terms (774 distinct terms). After several hours the calculation times out  
287 - having allocated 50.2 GB of RAM. In contrast our method uses a maximum of 174 MB  
288 of RAM and has no upper limit on the number of patients, visits, or unique terms.

289 The Disease Trajectory Browser (DTB) allows navigation of temporal relationships among  
290 medical records of 7.2 million Danish patients<sup>14</sup>. Direct comparison between our results  
291 is not possible since our groups have access to different EHR datasets, however we can  
292 consider differences in methodology. DTB measures effect size using relative risk,  
293 significance is measured using the binomial test, and confounders are controlled for using  
294 case/control matching. For comparison, on PBC-Web, we provide relative risk estimates  
295 and  $\chi^2$  p-values (which are a close approximation to the binomial test p-values). As  
296 described above, our approach models patient features rather than controlling for them  
297 through stratification or case/control matching.

## 298 Discussion

299 Although the term comorbidity is often used to denote significant associations between  
300 medical outcomes, (e.g., hypertension and heart attack), the concept is easily extended  
301 to include associated variables, such as medical procedures and medications. For  
302 brevity's sake, in what follows, we refer to statistically significant associations among  
303 these collective variables as comorbidities.

304 Comorbidity discovery is a feature discovery/selection process, and it is important to  
305 distinguish it from outcomes prediction. Before one can understand and predict a medical  
306 outcome, one must first decide which prior diagnoses, medical procedures and  
307 medications are germane to the outcome of interest. Discovery of comorbidities is thus a  
308 prerequisite for downstream outcomes research and for creating forecasting tools<sup>39-42</sup>,  
309 but is logically separate from them.

310 Big data offer many opportunities and challenges for comorbidity discovery. One limitation  
311 imposed by data size is that morbidity discovery is necessarily pairwise; hence the term  
312 comorbidity, as opposed to multimorbidity discovery. Tools for multimorbidity-based  
313 discovery<sup>43</sup> are necessarily limited in scale due to computational constraints, considering  
314 for instance, 34 disease clusters<sup>44</sup>. In contrast, we have calculated pairwise comorbidities  
315 among 37,997 ICD10 diagnosis codes.

316 Commonly used statistical approaches to *ab initio* comorbidity discovery are hindered by  
317 the assumption that every member of the population (or stratum) has a disease probability  
318 equal to the population (or stratum) incidence rate. As we have explained, stratification is  
319 commonly used to subset EHR collections to meet this requirement; but stratification  
320 necessarily reduces sample size and statistical power (c.f. **Figure 2**). In practice,  
321 stratified data quickly become limiting, even for very large datasets, as inclusion criteria  
322 grow more complex. This problem is exacerbated for *ab initio* approaches aimed at  
323 simultaneous discovery of comorbid relationships among thousands of diagnoses,  
324 procedures and medications. This process necessitates many millions of statistical tests;  
325 the requirement for multiple testing corrections mean that statistical power is of  
326 paramount importance.

327 Our motivation in developing PBC was to overcome the need for stratification, while still  
328 achieving high accuracy and statistical power, so as to allow discovery of comorbidities  
329 of rare diseases, using small datasets, and *ab initio* discovery using very large EHR  
330 collections. Our results document the efficacy of PBC for achieving these ends. Still, it is  
331 important to bear in mind, that the comorbidities it discovers do not necessarily indicate  
332 mechanistic relationships. For instance, two diagnoses may both be driven by smoking,  
333 but since smoking was not included logistic regression model, we cannot say anything  
334 about smoking as a potential driver (cause) of the relationship. Thus PBC, like all existing  
335 methods in this domain, cannot with certainty assign comorbidities to one of the four  
336 etiological models described by Valderas et al<sup>1</sup>; it can only say that the relationship is not  
337 due to factors included in the logistic regression model.

338 Our hope is that PBC will provide an effective solution for a foundational step for outcomes  
339 research. The curse of dimensionality is a well-known phenomenon in which training a  
340 predictor with too many features can lead to higher error rates<sup>45,46</sup>. Considering there are  
341 about 69,000 ICD10 diagnosis codes, 70,000 ICD10 procedure codes, and 350,000  
342 RxNorm CUI codes, dimensionality reduction is necessary for effective machine learning  
343 on EHRs. By discovering which variables influence which outcome, PBC can reduce  
344 dimensionality and facilitate the creation of downstream tools for outcome predictions.  
345 Thus, PBC's role in feature selection becomes clear. For a given clinical outcome, PBC  
346 can produce a manageable set of pairwise associations which become the inputs for  
347 training predictive models of disease.

348 It is important to note the limitations inherent in the use of data from a single EHR for  
349 comorbidity discovery. Data from a single EHR represents a non-random sampling of the



350 general population and PBC does not model this sampling bias. Billing practices can vary  
351 within hospital systems - for instance, between inpatient and outpatient services and  
352 between provider billing and hospital billing. Hospital billing is performed by medical billing  
353 specialists, whereas provider billing is performed by clinicians. In this paper, we have  
354 restricted our analysis to provider billing terms. Clinical notes provide a still richer, more  
355 nuanced source of data and may more accurately describe a patient's medical condition.  
356 Clearly application of PBC to the outputs of Natural Language Processing (NLP) tools will  
357 be a fruitful path for future research.

## 358 Conclusion

359 Capobianco and Lio<sup>47</sup> present a vision for comorbidity discovery and analysis that is multi-  
360 disciplinary and enabled by dynamic networks, with time as a key component in  
361 explaining disease relationships. We share this vision, and our PBC method directly  
362 addresses the challenges for creating a scalable network-based approach that can (1)  
363 dynamically adjust for confounding demographic variables and (2) model temporal  
364 relationships in large, complex EHR datasets. However, comorbidities do not exist as  
365 isolated pairs, rather they combine in a conditionally dependent manner to create a  
366 complex web of influence on any given outcome. While PBC is powered to discover that  
367 web by identifying the major drivers of a particular outcome, determining the joint  
368 contributions of conditionally dependent variables on that outcome requires a separate  
369 computational machinery. Bayesian networks<sup>48-49</sup>, for example can be used to compute  
370 the joint contributions of multiple conditionally dependent variables (so-called multimorbid  
371 calculations), providing fully explainable patient outcome predictions.

372 Obtaining a global overview of comorbidity and disease progressions across a major  
373 research hospital network is as difficult as it is desirable. We offer the PBC web-browser  
374 as a first-generation navigation tool for this new domain of EHR database visualization.  
375 Our hope is that the PBC website will provide a community resource for outcomes  
376 research, laying the foundation for improving current comorbidity-based outcomes tools,  
377 creation of new ones, and, more generally, fueling healthcare discovery for improved  
378 care.

## 379 Methods

### 380 ***University of Utah medical records***

381 The University of Utah maintains an Electronic Data Warehouse (EDW) – a central  
382 storage and search facility for all data collected from all university hospitals and clinics,  
383 and all departments and specialties. SQL queries were composed to the following  
384 information: (1) medical record number, sex, race, ethnicity, and age for each patient; (2)  
385 list of patient visits, along with visit date, and medical terms associated with each visit,  
386 including diagnostic codes, procedure codes, and medications ordered. Data were  
387 deidentified.

388 We collect ICD9<sup>17</sup> and ICD10<sup>18</sup> diagnosis codes CPT procedural codes<sup>20</sup> and RXNorm<sup>21</sup>  
389 medication codes (“concept unique identifiers”) from University of Utah electronic medical  
390 records. ICD and CPT diagnosis and procedure codes were mapped to the hierarchical  
391 Clinical Classification System (CCS)<sup>19</sup>. CCS codes allow for more powerful statistics at  
392 the expense of concept resolution. After mapping to CCS, we retain 1007 distinct

393 diagnosis codes and 259 distinct procedure codes. These codes include both internal  
394 nodes and leaf nodes in the hierarchical CCS tree. In all, we collected records for 1.6  
395 million patients, 50 million visits and 150 million diagnosis (DX), procedure (PX) and  
396 medication (RX) codes.

397 Counts of EDW patient demographics are displayed in **Table S1**. **Figure S1** displays how  
398 our data is distributed by gender and age decade. **Figure S1**, panel B shows how the  
399 length of patient medical records (in years) is distributed. Note that these lengths are  
400 limited by the history of electronic data collection at the University of Utah that began in  
401 the early 2000s but started to ramp up around 2009 and has since increased rapidly.  
402 Thus, we see the 95<sup>th</sup> percentile for medical history length is around 12-15 years for most  
403 age bins. **Figure S1** panels C and D show how the number of visits and the number of  
404 terms in a medical record trend with age. In almost all decades, women have more  
405 medical visits and medical terms than men, though this effect is most pronounced  
406 between 20 and 50.

#### 407 ***Logistic regression for person-term probabilities***

408 The initial step in comorbidity analysis is to ascertain the probability of a given term being  
409 found in a given person's medical record. A naïve approach could assign everyone the  
410 same probability based on the term's frequency in the database or within each age-  
411 gender strata as seen in other methods.

412 Our approach involves developing a logistic regression model for each term. The  
413 independent features,  $X$ , are the list of persons in the EHR along with their gender, race,  
414 ethnicity, financial class and risk exposure. Risk exposure includes the age of a person

415 at the time of their last visit as well as the length and density of their medical record.  
416 Length is defined as the number of days between first visit and last visit, while density is  
417 approximated by the number of visits within a medical record. The dependent outcome,  
418  $y$ , is a binary vector indicating whether each person has the term in their medical record.  
419 The value  $C$  is the inverse of regularization strength in L2 penalized logistic regression.  
420 Smaller values of  $C$  indicate stronger regularization. The coefficients are determined by  
421 minimizing the following loss function, where  $\beta$  represents the coefficients and  $c$  is a  
422 constant (see Scikit-learn documentation<sup>50</sup> for a more complete discussion of logistic  
423 regression):

$$424 \quad \min_{\beta, c} \frac{1}{2} \beta^T \beta + C \sum_{i=1}^n \log \left( \exp \left( -y_i (X_i^T \beta + c) \right) + 1 \right) \quad (1)$$

425 For each term, stratified 3-fold cross-validation is used to determine the optimal value for  
426  $C$  within the set  $\{10^{-14}, 10^{-13}, 10^{-12}, \dots, 10^{12}, 10^{13}, 10^{14}\}$ . Cross-validation relies on a scoring  
427 function to assess the accuracy of logistic regression, given differing values for  $C$ . We  
428 evaluated standard and custom score functions based on their ability to differentiate  
429 logistic regression results with differing  $C$  values (see Figure S2).

430 The above approach resulted in logistic regression models for each term, capable of  
431 predicting the probability that a given person has a given term. For rare terms, we find  
432 that the probabilities output by logistic regression may not sum up to the actual number  
433 of patients with the term. To account for this we adjust each probability by a bias  
434 correction factor such that the sum of the adjusted patient probabilities is equal to the

435 actual number of patients with the term. The exact form of this correction factor is given  
436 in the supplemental “Math.pdf”.

437 A limitation of logistic regression is the lack of a confidence metric on each predicted  
438 probability output by the regression model. For instance, predicted probabilities might be  
439 more accurate for patients of western European than African ancestry, because the  
440 corpus data is skewed for this demographic variable (see Table S1). To overcome this  
441 limitation, we divide our data into 6 randomized partitions, balanced so that the number  
442 of affected individuals in each partition is approximately equal. This partitioning is  
443 accomplished using “StratifiedKFold” from the python package sklearn<sup>46</sup>. Next each  
444 partition is used to fit a logistic regression model, using the previously determined  
445 regularization strength. Each model is used to predict the probability of each person  
446 having the term. These 6 probabilities are used to calculate a sample variance for each  
447 person-term probability,  $s_{P_{t \in m}}^2$ , where  $m$  represents a patient’s medical record,  $t$   
448 represents a medical term, and  $P_{t \in m}$  is the probability of term  $t$  in  $m$ . To be clear these 6  
449 LRMs are only used to calculate sample variance, while the LRM trained on the full  
450 dataset is used per-patient per-term probability predictions.

#### 451 ***Poisson Binomial for term pair p-values***

452 Our null hypothesis is that pairs of medical terms are independently distributed in  
453 University of Utah medical records,  $H_0: t1 \perp t2 | \mathcal{M}$ . A significant p-value would indicate  
454 that a pair of terms co-occur more often than would occur by chance. Given two  
455 independent terms,  $t1 \perp t2$  the probability the two would occur by chance in a given  
456 person’s medical record  $m$ , is the product of their individual probabilities:

457 
$$P_{\{t_1, t_2\} \subseteq m} = P_{t_1 \in m} * P_{t_2 \in m} \quad (2)$$

458 A naïve approach assumes person-term probabilities are equal to population incidence  
459 rates:

460 
$$P_{t_1 \in m} = \frac{|\mathcal{M}_{t_1}|}{|\mathcal{M}|}; P_{t_2 \in m} = \frac{|\mathcal{M}_{t_2}|}{|\mathcal{M}|} \quad (3)$$

461 Using the naïve approach, person-term-pair probabilities follow the binomial distribution  
462 with

463 
$$P_{\{t_1, t_2\} \subseteq m} = \frac{|\mathcal{M}_{t_1}|}{|\mathcal{M}|} * \frac{|\mathcal{M}_{t_2}|}{|\mathcal{M}|} \quad (4)$$

464 However, using logistic regression, we have different probabilities for each person/term  
465 pair. The Poisson binomial distribution is the discrete distribution of a sum of Bernoulli  
466 trials where the probability of each trial differs. Thus, using logistic regression, our data  
467 follows a Poisson binomial distribution.

468 Because the cumulative distribution function (CDF) of a Poisson binomial is  
469 computationally tractable only for a small number of values, numerous approximations  
470 have been developed<sup>52</sup>. We use the normal approximation because it is fast and accurate  
471 for large datasets. To determine a p-value using the normal approximation, the mean and  
472 variance for the Poisson binomial are calculated and used as parameters for a normal  
473 distribution. The mean of a Poisson binomial represents the expected number of  
474 University of Utah patients who will have in their medical record both terms in the pair and  
475 is calculated as the sum of probabilities for each person  $m$ :

476 
$$\mu_{t_1, t_2} = \sum_m^{\mathcal{M}} P_{t_1, t_2 | m} \quad (5)$$

477

478 The variance of a Poisson binomial is likewise similar in form to a binomial distribution:

479 
$$\sigma_{t_1, t_2}^2 = \sum_m^{\mathcal{M}} P_{\{t_1, t_2\} \subseteq m} (1 - P_{\{t_1, t_2\} \subseteq m}) \quad (6)$$

480 The Poisson binomial variance is augmented with the logistic regression variances  
481 described in the previous section ( $s_{P_{t_1 \subseteq m}}^2, s_{P_{t_2 \subseteq m}}^2$ ) using the product rule and the law of total  
482 variance. One can think of these variances as *measurement error* for  $P_{t_1 \subseteq m}$  and  $P_{t_2 \subseteq m}$   
483 and they are larger for rare terms.

484 The probability that a person has a pair of terms,  $P_{\{t_1, t_2\} \subseteq m}$ , can be so rare it exceeds the  
485 limits of floating-point arithmetic. Thus, we implement our methods in log-space. Our  
486 logistic regression models report per-patient per-term log probabilities. We calculate  
487  $\ln(\mu_{t_1, t_2})$  and  $\ln(\sigma_{t_1, t_2}^2)$  rather than summing in normal space. We use a numerical  
488 approximation to calculate the  $\ln(pvalue)$  of a normal distribution<sup>53</sup> (implemented as  
489 “gsl\_sf\_log\_erfc” in the Gnu scientific library<sup>54</sup>). To report significance, we use throughout  
490 this paper an alpha threshold of 0.05. Since we calculate p-values for 4,622,320 pairs of  
491 medical terms, our Bonferroni corrected alpha is set to 1.08e-08.

## 492 **Direction P-values**

493 Given two terms that occur together in medical records more often than would occur by  
494 chance, which term tends to occur first in the medical record, or do they tend to occur in  
495 the same time frame? We calculate p-values for the temporal nature of each association.  
496 For each patient with medical record  $m$ , the date of the first occurrence of each term in  $m$   
497 is recorded. Pairs of terms occurring within a window of size  $W$  are labeled as “in-window”.  
498 Pairs of terms occurring outside of  $W$  contribute to the  $t_1 \rightarrow t_2$  count or the  $t_2 \rightarrow t_1$   
499 count. For the analyses presented here, we chose a 90-day window, as this duration  
500 decreases noise associated with the date of information capture within the medical  
501 record, but the approach is valid over any interval. Note that some term relationships –  
502 such as a surgery procedure followed by an infection diagnosis – will only show a  
503 significant direction with a window smaller than 90 days. PBC-Web includes 4 window  
504 sizes (30, 90, 365, 730).

505 For a person with medical record  $m$ , containing terms 1 and 2 ( $\{t_1, t_2\} \subseteq m$ ), the  
506 probability that term 1 occurs before term 2 is a function of the ratio of the probabilities of  
507 the 2 terms:

$$508 \quad P_{t_1 \rightarrow t_2}^{m_{t_1, t_2}} = P_{t_1 \rightarrow t_2 | \{t_1, t_2\} \subseteq m}^m = \frac{P_{t_1}^m}{P_{t_1}^m + P_{t_2}^m} \quad (7)$$

509 Given  $\{t_1, t_2\} \subseteq m$ , the probability  $t_1$  and  $t_2$  occur within a time window of size  $W$ , is a  
510 function of the span or length of a person’s medical history,  $Span_m$ :



511 
$$P_{t_1 \sim t_2}^{m_{t_1, t_2}} = P_{t_1 \sim t_2 | \{t_1, t_2\} \subseteq m}^m = \begin{cases} 1, & \text{Span}_m \leq W \\ \frac{W}{\text{Span}_m} \left( 2 - \frac{W}{\text{Span}_m} \right), & \text{otherwise} \end{cases} \quad (8)$$

512 The above formula represents the percent of timepoints  $t_1$  and  $t_2$  that fall within  $W$  days  
513 of each other. The derivation of the formula is given in the supplemental “Math.pdf”.

514 The product of (7) and (8) gives the probability term 1 would precede term 2 within a  
515 window of size  $W$ :

516 
$$P_{t_1 \rightarrow t_2}^{m_{t_1, t_2}} = P_{t_1 \rightarrow t_2 | \{t_1, t_2\} \subseteq m}^{in W} = P_{t_1 \rightarrow t_2}^{m_{t_1, t_2}} \cdot P_{t_1 \sim t_2}^{m_{t_1, t_2}} \quad (9)$$

517 Similar logic can be applied to derive the “out-of-window” probability of term 1 occurring  
518 at least  $W$  days before term 2. A more complete explanation is found in supplemental  
519 “Math.pdf”. Direction p-values are calculated using a normal approximation of the Poisson  
520 Binomial CDF as in the previous section.

## 521 **Code, web-development, and calculations**

522 We implement our statistical analysis using Python, Cython and C. Cython is a static  
523 compiler for Python and the extended Cython programming language<sup>55</sup>. Scikit-learn<sup>51</sup> was  
524 used for Logistic regression studies. All the figures accompanying this article were  
525 generated using Matplotlib<sup>56</sup>. Our website is built using the Flask web framework<sup>57</sup>. The  
526 backend is pure python and the front end is JavaScript and D3<sup>58</sup>. Logistic regression  
527 modeling and pairwise calculation of Poisson Binomial p-values were performed at the  
528 University of Utah Center for High Performance Computing (CHPC) PHI protected  
529 environment. Training 3041 logistic regression models while tuning the regularization

530 strength with cross validation took 1959 CPU hours. Maximum memory usage was 174  
531 MB. Calculating comorbidity statistics for 4,623,841 term pairs took 7455 CPU hours while  
532 maximum memory usage was 87 MB.

## 533 Acknowledgements

534 The following collaborators have provided valuable discussion, feedback, and insight  
535 which has guided development of PBC: Bruce Bray, Vikrant Deshmukh, Karen Eilbeck,  
536 Edgar Javier Hernandez, Rashmee Shah. We thank members of the University of Utah  
537 EDW for facilitating access to medical records. The computational resources used were  
538 partially funded by the NIH Shared Instrumentation Grant 1S10OD021644-01A1.

539 This research was supported by the AHA Children's Strategically Focused Research  
540 Network grant (17SFRN33630041) and the Nora Eccles Treadwell Foundation. Gordon  
541 Lemmon was supported by NRSA training grant T32H757632. Sergiusz Wesolowski was  
542 supported by NRSA training grant T32DK110966-04 and the AHA Children's Strategically  
543 Focused Research Network Fellowship award (17SFRN33630041).

## 544 Author Contributions

545 Gordon Lemmon is the senior research associate leading PBC development and  
546 validation. Sergiusz Wesolowski is an applied mathematician who has helped formalize  
547 our approach to statistical testing. Alex Henrie was a software engineer on the project.  
548 Martin Tristani-Firouzi and Mark Yandell conceived of the project and secured research  
549 funding and played a key role in scientific discussions regarding development of PBC. All  
550 authors edited the manuscript.

## 551 Competing interests

552 GL, MY own shares in Backdrop Health, a University of Utah effort to commercialize  
553 Bayesian inference on health records. However, there are no financial ties regarding  
554 this research.

## 555 Data Availability

556 In this paper we calculate comorbidity statistics for all pairs of medical billing codes –  
557 including diagnoses, procedures, and medications. All of these p-values are available to  
558 query and download from the following link: <https://pbc.genetics.utah.edu/lemmon2021>.

## 559 Code Availability

560 We provide a CodeOcean capsule with code and data; the link is submitted by the  
561 editor to the reviewers during the peer-review process.

## 562 References

- 563 1. Valderas, J. M., Starfield, B., Sibbald, B., Salisbury, C. & Roland, M. Defining  
564 comorbidity: implications for understanding health and health services. *Ann. Fam.*  
565 *Med.* **7**, 357–363 (2009).
- 566 2. Lone, N. I. *et al.* Predicting risk of unplanned hospital readmission in survivors of  
567 critical illness: a population-level cohort study. *Thorax* **74**, 1046–1054 (2019).
- 568 3. Wang, H. *et al.* Predicting Hospital Readmission via Cost-Sensitive Deep Learning.  
569 *IEEE/ACM Trans. Comput. Biol. Bioinform.* **15**, 1968–1978 (2018).

- 570 4. Facchinetti, G. *et al.* Continuity of care interventions for preventing hospital  
571 readmission of older people with chronic diseases: A meta-analysis. *Int. J. Nurs.*  
572 *Stud.* **101**, 103396 (2020).
- 573 5. Atashi, A., Sarbaz, M., Marashi, S., Hajlaliasgari, F. & Eslami, S. Intensive Care  
574 Decision Making: Using Prognostic Models for Resource Allocation. *Stud. Health*  
575 *Technol. Inform.* **251**, 145–148 (2018).
- 576 6. Yurkovich, M., Avina-Zubieta, J. A., Thomas, J., Gorenchtein, M. & Lacaille, D. A  
577 systematic review identifies valid comorbidity indices derived from administrative  
578 health data. *J. Clin. Epidemiol.* **68**, 3–14 (2015).
- 579 7. Charlson, M. E., Pompei, P., Ales, K. L. & MacKenzie, C. R. A new method of  
580 classifying prognostic comorbidity in longitudinal studies: development and  
581 validation. *J. Chronic Dis.* **40**, 373–383 (1987).
- 582 8. Elixhauser, A., Steiner, C., Harris, D. R. & Coffey, R. M. Comorbidity Measures for  
583 Use with Administrative Data: *Med. Care* **36**, 8–27 (1998).
- 584 9. Roque, F. S. *et al.* Using Electronic Patient Records to Discover Disease  
585 Correlations and Stratify Patient Cohorts. *PLOS Comput. Biol.* **7**, e1002141 (2011).
- 586 10. Gutiérrez-Sacristán, A. *et al.* comoRbidity: an R package for the systematic  
587 analysis of disease comorbidities. *Bioinformatics* **34**, 3228–3230 (2018).
- 588 11. Moni, M. A., Xu, H. & Liò, P. CytoCom: a Cytoscape app to visualize, query and  
589 analyse disease comorbidity networks. *Bioinforma. Oxf. Engl.* **31**, 969–971 (2015).
- 590 12. Moni, M. A. & Liò, P. comoR: a software for disease comorbidity risk assessment.  
591 *J. Clin. Bioinforma.* **4**, 8 (2014).
- 592 13. Ronzano, F., Gutiérrez-Sacristán, A. & Furlong, L. I. Comorbidity4j: a tool for

- 593 interactive analysis of disease comorbidities over large patient datasets.  
594 *Bioinforma. Oxf. Engl.* **35**, 3530–3532 (2019).
- 595 14. Siggaard, T. *et al.* Disease trajectory browser for exploring temporal, population-  
596 wide disease progression patterns in 7.2 million Danish patients. *Nat. Commun.*  
597 **11**, 4952 (2020).
- 598 15. Winter, A. C., Rist, P. M., Buring, J. E. & Kurth, T. Prospective comorbidity-  
599 matched study of Parkinson’s disease and risk of mortality among women. *BMJ*  
600 *Open* **6**, (2016).
- 601 16. Johnson, Alistair *et al.* MIMIC-IV (version 1.0). *Physionet*. doi:10.13026/S6N6-  
602 XD98 (2021).
- 603 17. ICD-9-CM - International Classification of Diseases, Ninth Revision, Clinical  
604 Modification. <https://www.cdc.gov/nchs/icd/icd9cm.htm> (2019).
- 605 18. ICD-10-CM - International Classification of Diseases, Tenth Revision, Clinical  
606 Modification. <https://www.cdc.gov/nchs/icd/icd10cm.htm> (2020).
- 607 19. Clinical Classifications Software Refined (CCSR). [https://www.hcup-](https://www.hcup-us.ahrq.gov/toolssoftware/ccsr/ccs_refined.jsp)  
608 [us.ahrq.gov/toolssoftware/ccsr/ccs\\_refined.jsp](https://www.hcup-us.ahrq.gov/toolssoftware/ccsr/ccs_refined.jsp).
- 609 20. CPT Codes - Current Procedural Terminology - AAPC.  
610 <https://www.aapc.com/resources/medical-coding/cpt.aspx>.
- 611 21. Liu, S., Wei Ma, Moore, R., Ganesan, V. & Nelson, S. RxNorm: prescription for  
612 electronic drug information exchange. *IT Prof.* **7**, 17–23 (2005).
- 613 22. Youden, W. J. Index for rating diagnostic tests. *Cancer* **3**, 32–35 (1950).
- 614 23. Han, H. *et al.* Hypertension and breast cancer risk: a systematic review and meta-  
615 analysis. *Sci. Rep.* **7**, (2017).

- 616 24. Li, X. *et al.* Comorbidities among patients with cancer who do and do not develop  
617 febrile neutropenia during the first chemotherapy cycle. *J. Oncol. Pharm. Pract.*  
618 *Off. Publ. Int. Soc. Oncol. Pharm. Pract.* **22**, 679–689 (2016).
- 619 25. Chia, V. M. *et al.* Chronic comorbid conditions associated with risk of febrile  
620 neutropenia in breast cancer patients treated with chemotherapy. *Breast Cancer*  
621 *Res. Treat.* **138**, 621–631 (2013).
- 622 26. Toma-Dasu, I., Wojcik, A. & Kjellsson Lindblom, E. Risk of second cancer following  
623 radiotherapy. *Phys. Medica PM Int. J. Devoted Appl. Phys. Med. Biol. Off. J. Ital.*  
624 *Assoc. Biomed. Phys. AIFB* **42**, 211–212 (2017).
- 625 27. Donin, N. *et al.* Risk of second primary malignancies among cancer survivors in  
626 the United States, 1992 through 2008. *Cancer* **122**, 3075–3086 (2016).
- 627 28. Grantzau, T. & Overgaard, J. Risk of second non-breast cancer among patients  
628 treated with and without postoperative radiotherapy for primary breast cancer: A  
629 systematic review and meta-analysis of population-based studies including  
630 522,739 patients. *Radiother. Oncol. J. Eur. Soc. Ther. Radiol. Oncol.* **121**, 402–413  
631 (2016).
- 632 29. Rissanen, J. Modeling by shortest data description. *Automatica* **14**, 465–471  
633 (1978).
- 634 30. Hassell, K. L. Population estimates of sickle cell disease in the U.S. *Am. J. Prev.*  
635 *Med.* **38**, S512-521 (2010).
- 636 31. Ahmadi, M., Poormansouri, S., Beiranvand, S. & Sedighie, L. Predictors and  
637 Correlates of Fatigue in Sickle Cell Disease Patients. *Int. J. Hematol.-Oncol. Stem*  
638 *Cell Res.* **12**, 69–76 (2018).

- 639 32. Herson, J., Sharma, S., Crocker, C. L. & Jones, D. Physical complaints of patients  
640 with sickle cell trait. *J. Reprod. Med.* **14**, 129–132 (1975).
- 641 33. Aich, A., Jones, M. K. & Gupta, K. Pain and sickle cell disease. *Curr. Opin.*  
642 *Hematol.* **26**, 131–138 (2019).
- 643 34. Tariq, S. & Aronow, W. S. Use of Inotropic Agents in Treatment of Systolic Heart  
644 Failure. *Int. J. Mol. Sci.* **16**, 29060–29068 (2015).
- 645 35. Anders, H.-J., Huber, T. B., Isermann, B. & Schiffer, M. CKD in diabetes: diabetic  
646 kidney disease versus nondiabetic kidney disease. *Nat. Rev. Nephrol.* **14**, 361–377  
647 (2018).
- 648 36. Koye, D. N., Magliano, D. J., Nelson, R. G. & Pavkov, M. E. The Global  
649 Epidemiology of Diabetes and Kidney Disease. *Adv. Chronic Kidney Dis.* **25**, 121–  
650 132 (2018).
- 651 37. El Fane, M. *et al.* [Pneumocystosis during HIV infection]. *Rev. Pneumol. Clin.* **72**,  
652 248–254 (2016).
- 653 38. Seravalle, G. & Grassi, G. Obesity and hypertension. *Pharmacol. Res.* **122**, 1–7  
654 (2017).
- 655 39. Choi, E., Xiao, C., Stewart, W. F. & Sun, J. MiME: Multilevel Medical Embedding of  
656 Electronic Health Records for Predictive Healthcare. *ArXiv181009593 Cs Stat*  
657 (2018).
- 658 40. Rajkomar, A. *et al.* Scalable and accurate deep learning with electronic health  
659 records. *Npj Digit. Med.* **1**, 1–10 (2018).
- 660 41. Franz, L., Shrestha, Y. R. & Paudel, B. A Deep Learning Pipeline for Patient  
661 Diagnosis Prediction Using Electronic Health Records. *ArXiv200616926 Cs* (2020).

- 662 42. Miotto, R., Li, L., Kidd, B. A. & Dudley, J. T. Deep Patient: An Unsupervised  
663 Representation to Predict the Future of Patients from the Electronic Health  
664 Records. *Sci. Rep.* **6**, 26094 (2016).
- 665 43. Hassaine, A., Salimi-Khorshidi, G., Canoy, D. & Rahimi, K. Untangling the  
666 complexity of multimorbidity with machine learning. *Mech. Ageing Dev.* **190**,  
667 111325 (2020).
- 668 44. Hassaine, A. *et al.* Learning multimorbidity patterns from electronic health records  
669 using Non-negative Matrix Factorisation. *J. Biomed. Inform.* **112**, 103606 (2020).
- 670 45. Chandrasekaran, B. & Jain, A. K. Quantization Complexity and Independent  
671 Measurements. *IEEE Trans. Comput.* **C-23**, 102–106 (1974).
- 672 46. Trunk, G. V. A Problem of Dimensionality: A Simple Example. *IEEE Trans. Pattern*  
673 *Anal. Mach. Intell.* **PAMI-1**, 306–307 (1979).
- 674 47. Capobianco, E. & Lio', P. Comorbidity: a multidimensional approach. *Trends Mol.*  
675 *Med.* **19**, 515–521 (2013).
- 676 48. Pearl, J. Reverend bayes on inference engines: a distributed hierarchical  
677 approach. in *Proceedings of the Second AAAI Conference on Artificial Intelligence*  
678 133–136 (AAAI Press, 1982).
- 679 49. Pearl, J. *Causality: models, reasoning, and inference*. (Cambridge University  
680 Press, 2013).
- 681 50. 1.1. Linear Models — scikit-learn 0.24.1 documentation. [https://scikit-](https://scikit-learn.org/stable/modules/linear_model.html#logistic-regression)  
682 [learn.org/stable/modules/linear\\_model.html#logistic-regression](https://scikit-learn.org/stable/modules/linear_model.html#logistic-regression).
- 683 51. Pedregosa, F. *et al.* Scikit-learn: Machine Learning in Python. *J. Mach. Learn. Res.*  
684 **12**, 2825–2830 (2011).



- 685 52. Hong, Y. On computing the distribution function for the Poisson binomial  
686 distribution. *Comput. Stat. Data Anal.* **59**, 41–51 (2013).
- 687 53. Hart, J. F. *Computer approximations*. (Wiley, 1968).
- 688 54. *GNU scientific library: reference manual*. (Network Theory, 2009).
- 689 55. Behnel, S. *et al.* Cython: The Best of Both Worlds. *Comput. Sci. Eng.* **13**, 31–39  
690 (2011).
- 691 56. Hunter, J. D. Matplotlib: A 2D Graphics Environment. *Comput. Sci. Eng.* **9**, 90–95  
692 (2007).
- 693 57. Grinberg, M. *Flask web development: developing web applications with Python*.  
694 (O'Reilly, 2018).
- 695 58. Bostock, M., Ogievetsky, V. & Heer, J. D<sup>3</sup>: Data-Driven Documents. *IEEE Trans.*  
696 *Vis. Comput. Graph.* **17**, 2301–2309 (2011).

697 Display Items

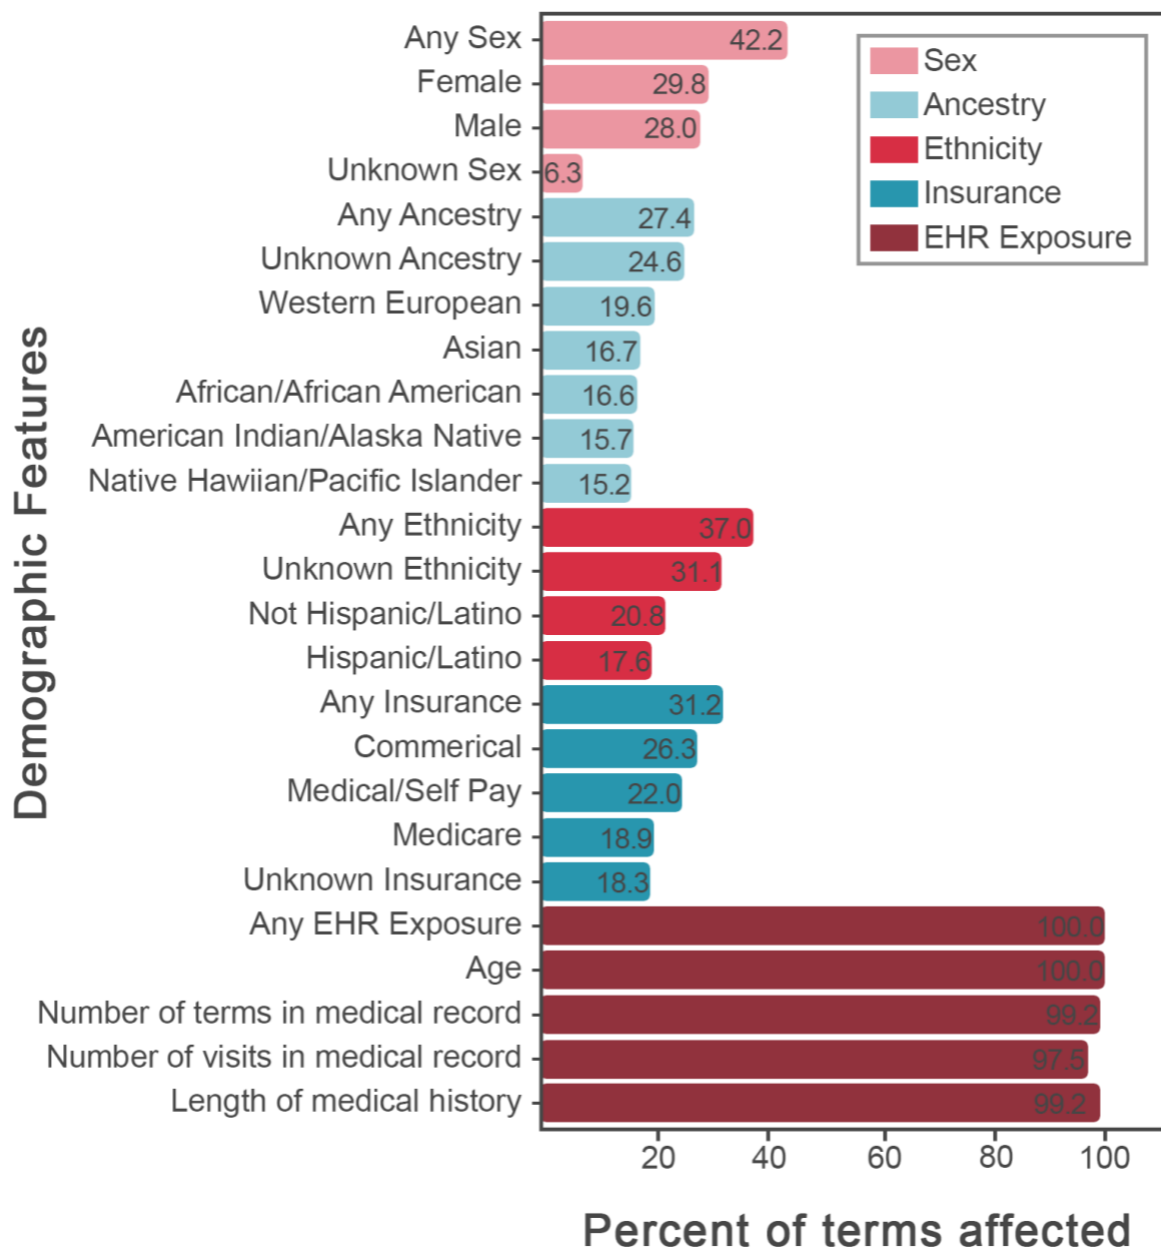

698

699 **Figure 1. Feature selection by L1 regularization.** Percent of medical term logistic  
700 regression models that include each demographic feature. For example, EHR exposure,  
701 i.e., the length and density of a person’s medical history, is an important predictor for  
702 every medical diagnosis, procedure and medication.

703 **Figure 2. PBC maintains power for discovery by modeling the effects of**  
704 **confounding variables.** We calculate the percent of significantly co-occurring pairs of  
705 medical terms ( $p < 1.08e-8$ ) using either PBC (blue lines) or stratification (red lines) for  
706 two different sample sizes (Entire EHR corpus [1.6 million individuals, filled circles], and  
707 a 78,275 patient sample [open squares]). Moving from left to right we introduce  
708 additional features to the PBC approach and additional filters to the stratification  
709 approach. The X-axis numbering corresponds to the following features/filters: 0: no  
710 features; 1: race / African American; 2: sex / Female; 3: Age / 50-59; 4: Ethnicity /  
711 nonhispanic; 5: Insurance / Commercial; 6: Span / at least 2 years; 7: Number of visits /  
712 at least 3 visits; 8: Date of last visit / at least as recent as Jan 2018. The figure  
713 highlights 2 important trends. First, the number of significant associations decreases as  
714 a function of smaller datasets. Second, controlling for specific features markedly  
715 reduces the number of recovered comorbidities for the stratification approach (an effect

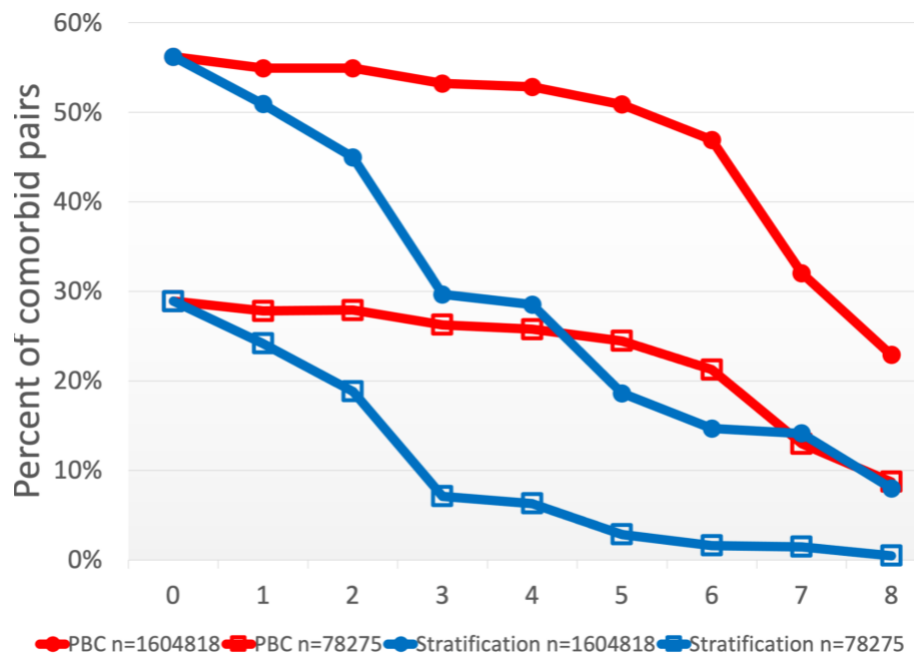

716 further exacerbated by reducing the initial cohort size), while preserving significant

717 comorbidities using PBC.

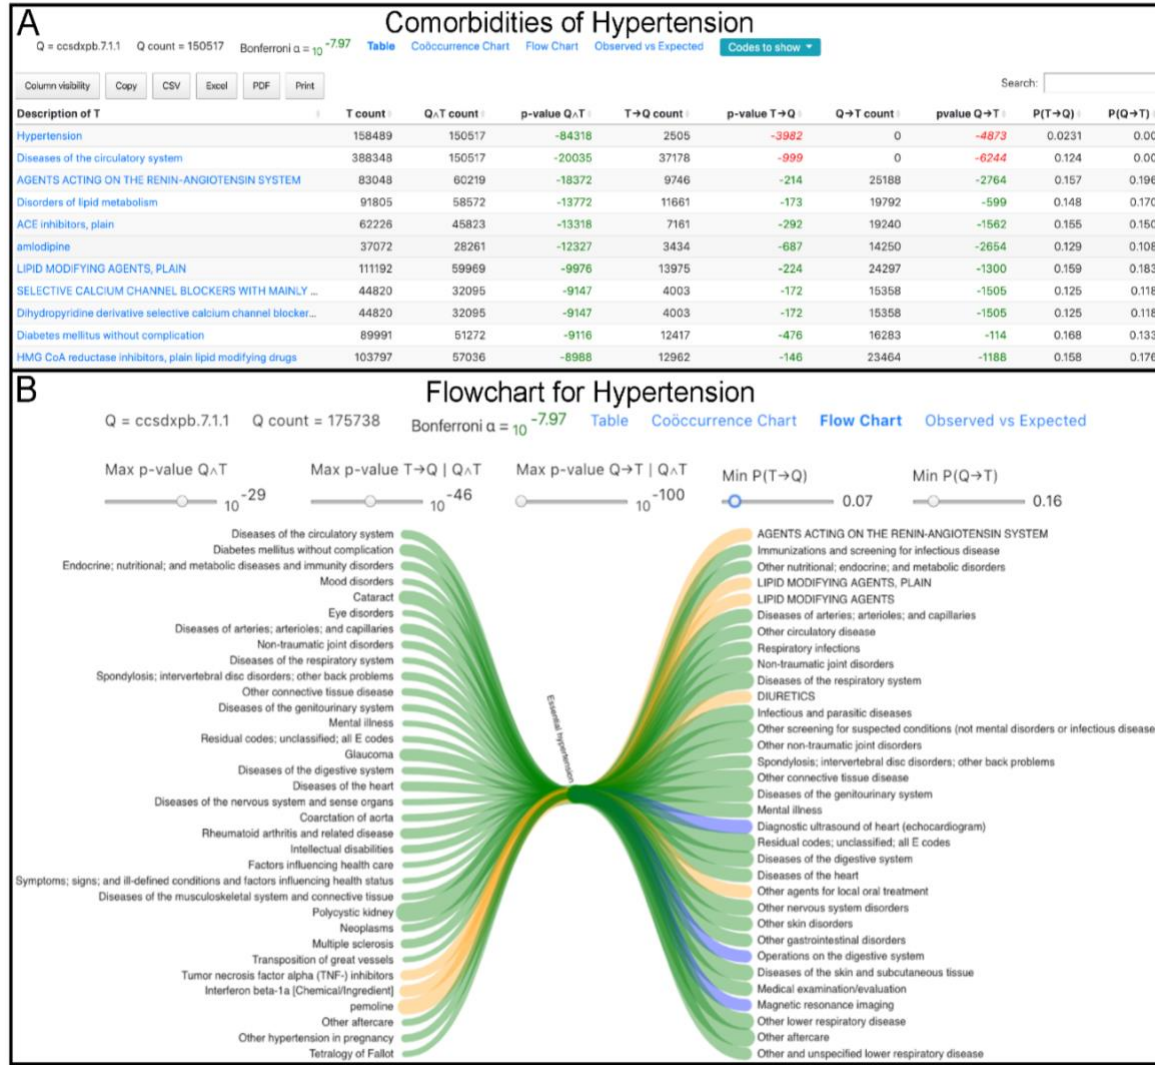

719 **Figure 3. Screenshots from PBC web.** “Q” refers to the query term, in this case  
720 hypertension. “T” refers to the term possibly comorbid with Q. **Panel A**, Code prefixes in  
721 the first column can be deciphered as follows: ccs = “clinical classification system”, dx =  
722 diagnosis, px = procedure, pb = provider billing (we omit hospital billing codes in this  
723 figure), cui = RxNorm concept unique identifier. P-values that pass the Bonferroni  
724 corrected significance threshold are colored green or red. Green indicates the  
725 relationship occurs more often than expected. Red indicates less often than expected.  
726 The last two columns represent flow rates which indicate the actual percent of patients  
727 in our database that transit from one term to the next over time. **Panel B**, Terms that  
728 significantly precede or follow hypertension (separated by at least 90 days) are shown  
729 to the left and right of hypertension respectively. Green connections are diagnoses, blue  
730 connections are procedures and orange connections are medications. The thickness of  
731 the connection relates to the flow rate – the percent of patients that flow through the  
732 given path.

733 **Table 1. PBC retains power as features are added; stratification loses power.**

734 Shown are 3 established comorbidities from the medical literature: concussion and  
735 migraine (41), multiple myeloma and multiple sclerosis (42) and cancer of pancreas and  
736 hypertension (43). Comorbidities passing a Bonferroni corrected alpha threshold of  
737 **1.08e-8** are colored blue. As features are added to the stratification criteria, sample size  
738 shrinks and statistical significance is lost. Rather than controlling for confounding  
739 variables, PBC models their effects. Thus, for PBC sample size remains constant at  
740 1,538,059 and statistical significance is preserved.

| Stratification filters | PBC features | Concussion and migraine |         | Multiple myeloma and Multiple sclerosis |         | Cancer of pancreas and hypertension |        |
|------------------------|--------------|-------------------------|---------|-----------------------------------------|---------|-------------------------------------|--------|
|                        |              | P-values                |         |                                         |         |                                     |        |
|                        |              | $\chi^2$                | PBC     | $\chi^2$                                | PBC     | $\chi^2$                            | PBC    |
| No filters (n=1538059) | none         | 1e-933                  | 1e-933  | 1e-121                                  | 1e-121  | 1e-405                              | 1e-405 |
| female (n=794281)      | +sex         | 1e-860                  | 1e-937  | 1e-70                                   | 1e-135  | 1e-191                              | 1e-400 |
| +age 50-59 (n=69527)   | +age         | 1e-126                  | 1e-1031 | 1.6e-5                                  | 2.5e-65 | 7e-7                                | 1e-239 |
| +Caucasian (n=45782)   | +ancestry    | 1e-92                   | 1e-912  | 1.5e-5                                  | 2e-87   | 5e-7                                | 1e-159 |
| +nonhispanic (n=39897) | +ethnicity   | 1e-91                   | 1e-886  | 4.8e-7                                  | 2e-87   | 6e-11                               | 1e-61  |
| +commercial (n=21148)  | +insurance   | 1e-4                    | 1e-859  | 0.32                                    | 3e-80   | 8e-4                                | 5e-61  |
| +3yr history (n=9243)  | +span        | .087                    | 1e-522  | 0.41                                    | 1.6e-60 | 0.03                                | 5e-78  |

742 **Table 2. PBC identifies comorbidities specific to underrepresented minorities**  
743 **even when data is limited.** Here we compare the stratification-based approach with  
744 PBC as regards ability to identify a known comorbidity: sickle cell anemia (SCA) paired  
745 with malaise and fatigue. P-values passing a Benjamini-Hockberg corrected alpha  
746 threshold of **1.0e-6** are colored blue. Without modeling the effects of confounding  
747 variables, both approaches identify the association. But because ancestry is a key  
748 determinant of risk for SCA, we need to control for this confounding variable to  
749 determine whether malaise and fatigue is an actual symptom of sickle cell anemia or  
750 whether the connection is being driven by ancestry. Filters applied under stratification  
751 lead to samples too small to detect this association. In contrast, not only does PBC  
752 detect the comorbidity, but the strength of the association increases as confounders  
753 such as ancestry, ethnicity and age are included in the model.

| Stratum filters            | PBC features | Sickle Cell Anemia paired with Malaise and Fatigue |                  |             |
|----------------------------|--------------|----------------------------------------------------|------------------|-------------|
|                            |              | Stratum Pair count                                 | $\chi^2$ p-value | PBC p-value |
| No filters (n=477,070)     | no features  | 19                                                 | 4e-8             | 4e-8        |
| Caucasian (n=276,496)      | ancestry     | 5                                                  | 0.002            | 2e-8        |
| African American (n=7,035) | ancestry     | 9                                                  | 2e-5             | 2e-8        |
| +Nonhispanic (n=6,039)     | +ethnicity   | 8                                                  | 2e-4             | 1e-8        |
| +Female (n=2,789)          | +gender      | 7                                                  | 1e-4             | 9e-8        |
| +50-59 (n=302)             | +age         | 3                                                  | 0.004            | 3e-19       |





755 **Table 3. PBC is the only comorbidity search tool that takes a high-resolution**  
 756 **approach.** CytoCom and comoR are no longer available; comoRbidity and  
 757 Comorbidity4j failed to scale to datasets of our size. In addition to scaling to handle  
 758 arbitrarily large EHR datasets, PBC models the effects of demographic information  
 759 rather than relying on stratification.

| Package                              | CytoCom   | comoR      | comoRbidity | Comorbidity4j | DTB*                       | PBC-web                    |
|--------------------------------------|-----------|------------|-------------|---------------|----------------------------|----------------------------|
| Release date                         | 2014      | 2014       | 2018        | 2019          | 2020                       | 2021                       |
| Relative Risk <sup>†</sup>           | ✓         | ✓          | ✓           | ✓             | ✓                          | ✓                          |
| $\phi$ -correlation <sup>†</sup>     | ✓         | ✓          | ✓           | ✓             |                            | ✓                          |
| Comorbidity score <sup>†</sup>       |           |            | ✓           | ✓             |                            | ✓                          |
| Odds ratio <sup>†</sup>              |           |            | ✓           | ✓             |                            | ✓                          |
| Fisher's Exact test <sup>†</sup>     |           | ✓          | ✓           | ✓             |                            | ✓                          |
| $\chi^2$ or Binomial test            |           |            |             |               | ✓                          | ✓                          |
| Poisson Binomial <sup>‡</sup>        |           |            |             |               |                            | ✓                          |
| Inverse comorbidities                |           |            |             |               |                            | ✓                          |
| Temporal directionality              |           |            | ✓           | ✓             | ✓                          | ✓                          |
| Interactive network of comorbidities | ✓         |            |             |               | ✓                          | ✓                          |
| Arbitrarily large datasets           |           |            |             |               | See note <sup>§</sup>      | ✓                          |
| Dealing with confounders             | stratify  | no support | stratify    | stratify      | matching                   | Logistic regression        |
| Platform                             | Cytoscape | R package  | R package   | Java/website  | Publicly available website | Publicly available website |

\*Disease Trajectory Browser

<sup>†</sup>Statistics that rely on population incidence rate

<sup>‡</sup>Statistics that rely on per-person per-term probabilities

<sup>§</sup>Authors apply a pre-filtering step because calculating all pairs of comorbidities is too computationally demanding

## 760 Supplemental Display Items

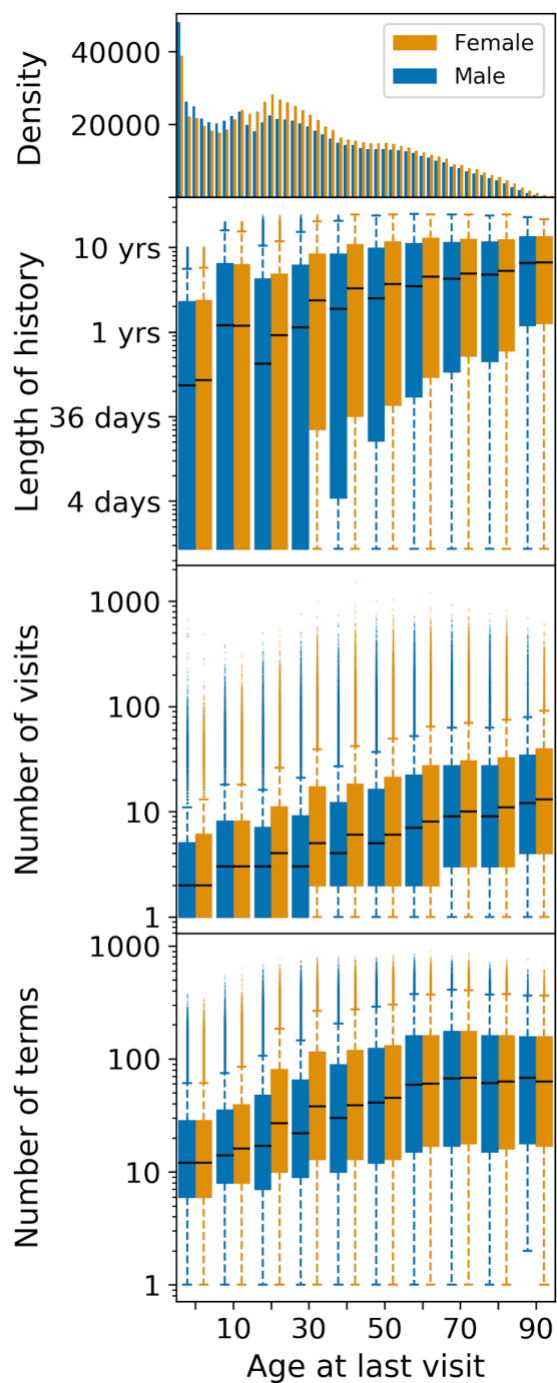

761

762 **Figure S1. University of Utah medical records binned by age-decade.** Boxplots  
 763 show median (black line), 25<sup>th</sup> and 75<sup>th</sup> percentile (box ends), 95<sup>th</sup> and 5<sup>th</sup> percentile  
 764 (whisker caps) and outliers. Number of terms (bottom panel) is a count of distinct  
 765 diagnoses, procedures and medications found in each patient's medical history.

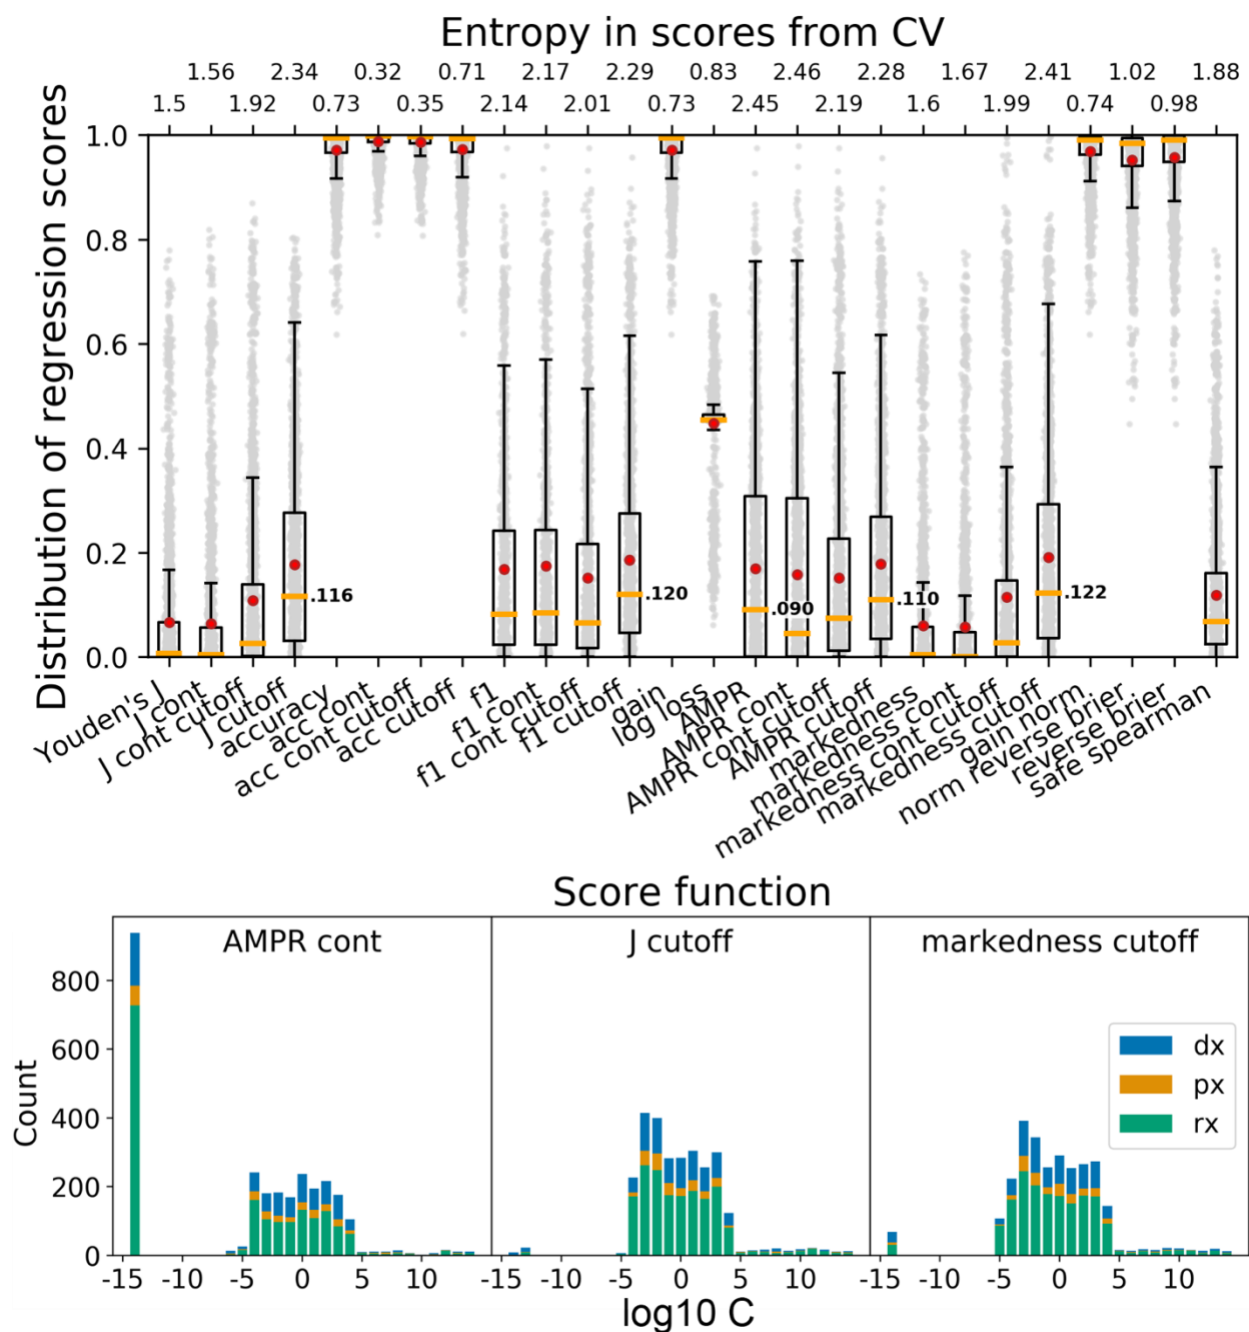

767 **Figure S2. J cutoff maximizes entropy and minimizes outliers.** Comparison of score  
768 functions for logistic regression C-value optimization. For each score function, we  
769 evaluated C-values ranging from  $10^{-14}$  to  $10^{14}$ . Top: For each of 3041 DX, PX, and RX  
770 terms, we use cross validation to select the C-value that achieves the best score. Each  
771 boxplot contains these 3041 best scores as evaluated with different score functions.  
772 Bottom: Distribution of C-values for 3 score functions with high entropy. J\_cutoff was  
773 chosen for downstream analysis because it has high entropy and has a smooth C-value  
774 distribution without the large outlier at C=-14.

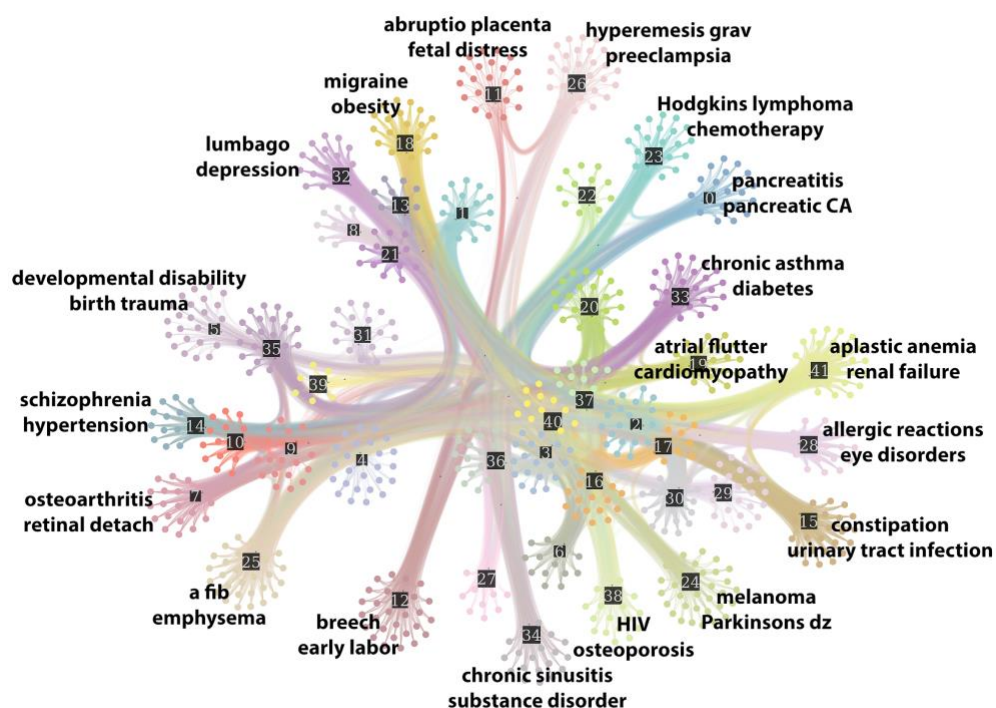

775 **Figure S3.** Minimum description length of the comorbidity network discovered by the  
776 PBC approach for diagnoses in the University of Utah EDW. Examples of significantly  
777 associated medical conditions within each cluster are displayed. Citations supporting  
778 these associations are listed in Suppl Table S5.

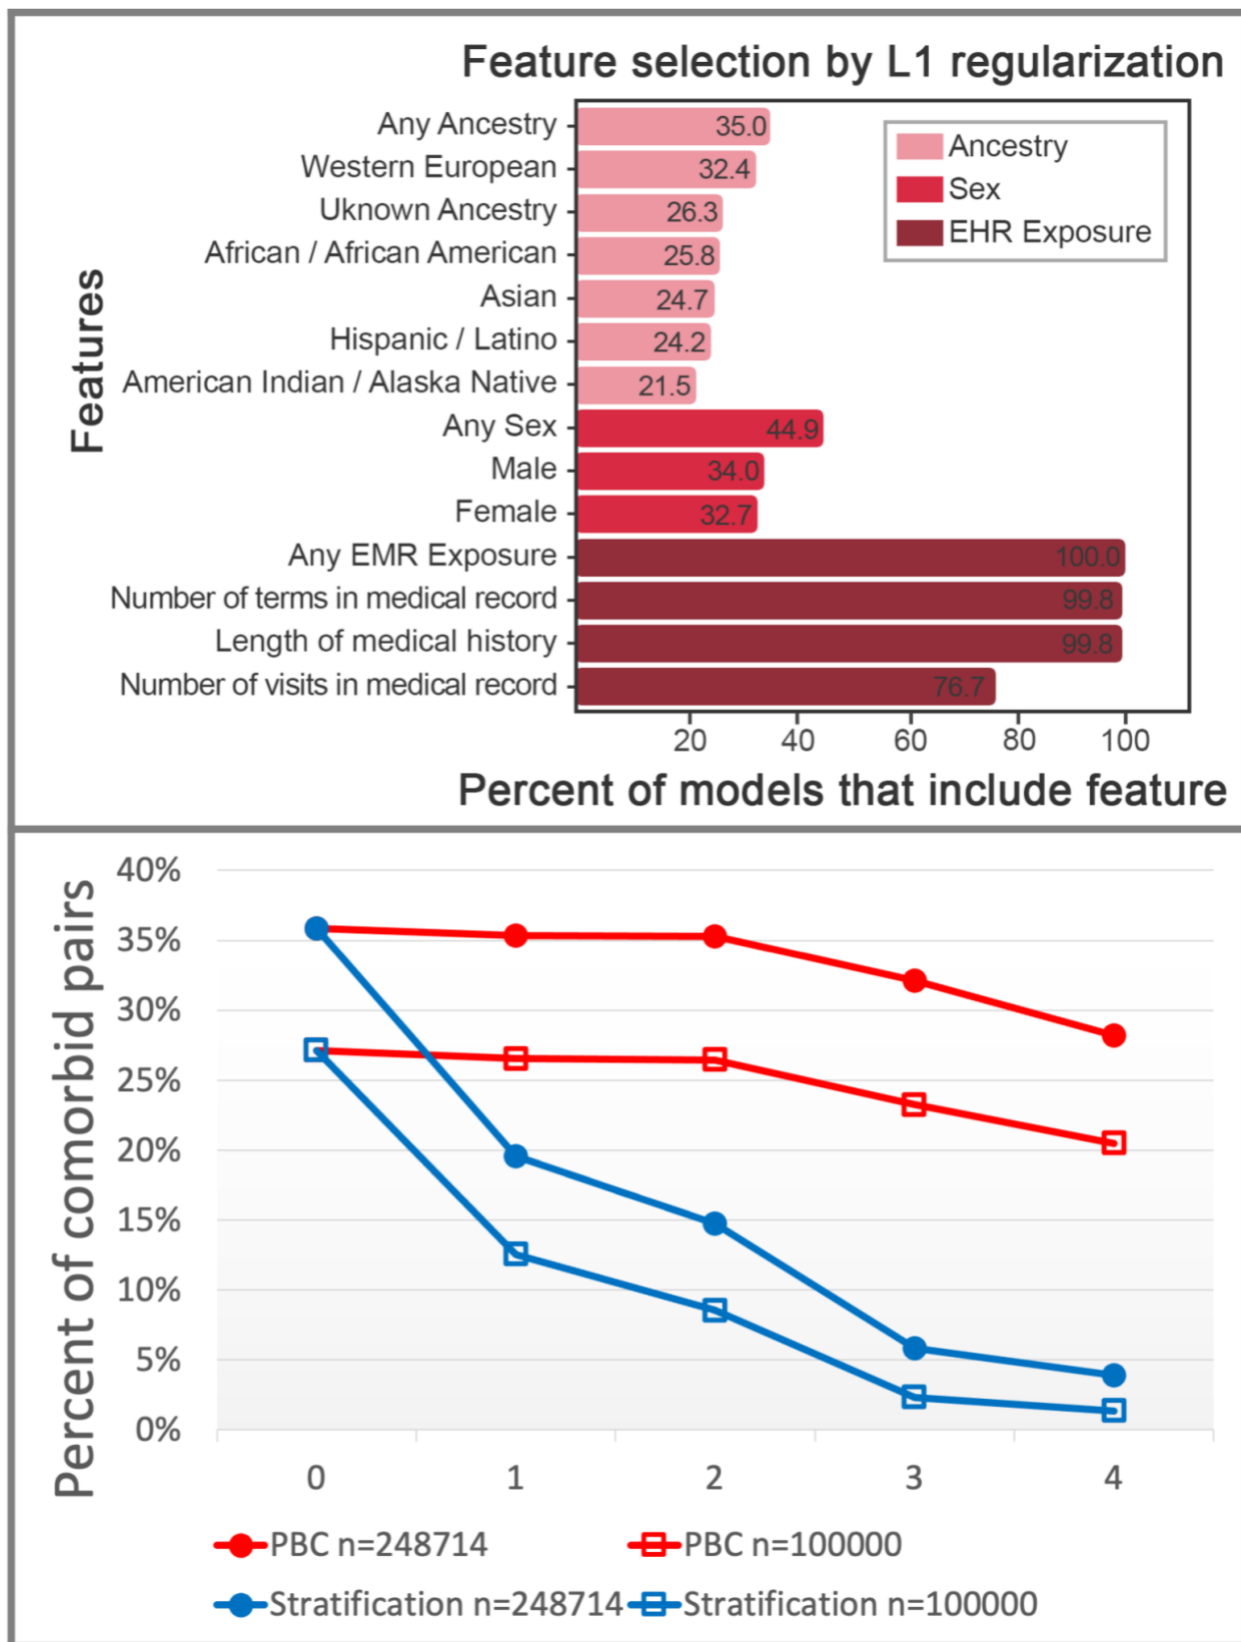

780 **Figure S4. Deployment of PBC on MIMIC-IV EHR data.** See Figure 1 legend for  
781 description of top panel and Figure 2 legend for description of bottom panel. Bottom  
782 panel, the X-axis ticks correspond to the addition of regression features (PBC) or  
783 stratification criteria from left to right: 0 - no features, no stratification, 1- gender/female,  
784 2 - ancestry/African American, 3 - length of medical history/at least 2 years, 4 - number  
785 of visits/at least 3 visits. The MIMIC-IV results are very similar to the University of Utah  
786 results, reinforcing a key message of this paper - that PBC retains the power to identify  
787 comorbid relationships that are lost by stratification.

788 **Table S1. University of Utah patient demographics.** Total number of patients is  
789 1,604,818.

| Gender                              |        | Ethnicity                        |         |
|-------------------------------------|--------|----------------------------------|---------|
| Female                              | 868758 | Not hispanic                     | 894511  |
| Male                                | 815855 | Hispanic or latino               | 176944  |
| Unknown                             | 192    | Unknown                          | 613350  |
| Ancestry                            |        |                                  |         |
| Caucasian                           | 959848 | Asian                            | 30952   |
| Unknown/other                       | 644805 | African American                 | 25074   |
| Native Hawaiian or Pacific Islander | 14445  | American Indian or Alaska Native | 9681    |
| Financial Class (insurance)         |        |                                  |         |
| Commercial                          | 912535 | Medicaid/uninsured               | 379651  |
| Medicare                            | 159668 | Other/Unknown                    | 152,964 |

790

791 **Table S2. Overlap between comorbidities plotted in Figure 2.** Each line in Figure 2  
792 consists of 9 points. For every two adjacent points in these lines, we calculate the size  
793 of the intersection of the left point (A) and the right point (B) and divide by the size of B.  
794 In set notation, we calculate  $|A \cap B| / |B|$ , i.e., the percent of B that is contained in A. As  
795 seen in this table, the comorbidities discovered as features are added - are almost  
796 entirely subsets of the model without the feature. Values of nan are present when B is  
797 empty.

| A | B | PBC  | Binomial,<br>female 50-59 | PBC  | Binomial,<br>female 50-59 | PBC  | Stratification |
|---|---|------|---------------------------|------|---------------------------|------|----------------|
| 0 | 1 | 100% | 99%                       | 100% | 96%                       | 100% | 96%            |
| 1 | 2 | 99%  | 97%                       | 98%  | 89%                       | 98%  | 83%            |
| 2 | 3 | 98%  | 98%                       | 97%  | 95%                       | 96%  | nan            |
| 3 | 4 | 98%  | 98%                       | 97%  | nan                       | 96%  | nan            |
| 4 | 5 | 99%  | 81%                       | 98%  | nan                       | 96%  | nan            |
| 5 | 6 | 99%  | 99%                       | 98%  | nan                       | 96%  | nan            |
| 6 | 7 | 99%  | 99%                       | 99%  | nan                       | 97%  | nan            |
| 7 | 8 | 99%  | 83%                       | 97%  | nan                       | 95%  | nan            |

798



799 **Table S3. PBC retains known breast cancer comorbidities lost by the stratification**  
800 **approach.** Comorbidities passing a Bonferroni corrected alpha threshold of **1.08e-8** are  
801 colored blue. Stratification by sex and age (considering only females in their 50s)  
802 eliminates significant associations for most known comorbidities of breast cancer, with  
803 the exception of endometriosis, a comorbidity of uncertain significance. PBC retains  
804 statistical power while modelling the effects of confounding variables. Our approach  
805 does not consider endometriosis as a comorbid condition of breast cancer.

| Representative Comorbidities of Breast Cancer: p-values |                   |                        |         |
|---------------------------------------------------------|-------------------|------------------------|---------|
| Potential Comorbidity                                   | binomial all data | binomial, female 50-59 | PBC     |
| Hypertension                                            | 1e-1680           | 3.2e-8                 | 1e-63   |
| Osteoarthritis                                          | 1e-1491           | 2.5e-5                 | 1e-101  |
| Cancer of colon                                         | 1e-265            | 1.3e-6                 | 1e-25   |
| Melanomas of skin                                       | 1e-165            | 1.6e-8                 | 1e-15   |
| Cancer of kidney                                        | -1e-108           | 5e-4                   | 1.6e-13 |
| Endometriosis                                           | 1e-106            | 1e-15                  | 3.2e-6  |

806 **Table S4. Replication of Table 1 on MIMIC-IV data.** See legend for Table 1. MIMIC-IV  
807 data does not include patient age, ethnicity or insurance type so these rows are omitted.  
808 Only 1 patient in the MIMIC-IV data set has both multiple myeloma and multiple  
809 sclerosis. For the other two known comorbidites - the trend is clear - PBC retains power  
810 as additional features are added to the model. Stratification results in a loss of statistical  
811 power.

| Stratification filters | PBC features | Concussion and migraine |       | Multiple myeloma and Multiple sclerosis |       | Cancer of pancreas and hypertension |      |
|------------------------|--------------|-------------------------|-------|-----------------------------------------|-------|-------------------------------------|------|
|                        |              | P-values                |       |                                         |       |                                     |      |
|                        |              | $\chi^2$                | PBC   | $\chi^2$                                | PBC   | $\chi^2$                            | PBC  |
| No filters (n=248,714) | none         | -2.46                   | -2.46 | -0.00                                   | -0.00 | -420                                | -420 |
| female (n=128676)      | +sex         | -2.43                   | -2.46 | -0.00                                   | -0.00 | -183                                | -419 |
| +Caucasian (n=78092)   | +ancestry    | -1.50                   | -3.02 | -0.00                                   | -0.00 | -117                                | -391 |
| +3yr history (n=10239) | +span        | 0.0                     | -2.38 | -0.00                                   | -0.00 | -1.88                               | -331 |

812

813 **Table S5. Replication of Table 2 on MIMIC-IV data.** See legend for Table 2. While the  
 814 dataset is too small to measure a significant comorbidity between Sickle Cell Anemia  
 815 and Malaise and Fatigue using either method, we still see that PBC retains statistical  
 816 power lost by stratification. For very small sample sizes, stratification is not an option.

| Stratum filters            | PBC features | Sickle Cell Anemia paired with Malaise and Fatigue |                  |             |
|----------------------------|--------------|----------------------------------------------------|------------------|-------------|
|                            |              | Stratum Pair count                                 | $\chi^2$ p-value | PBC p-value |
| No filters (n=477,070)     | no features  | 9                                                  | -2.00            | -2.00       |
| Caucasian (n=276,496)      | ancestry     | 0                                                  | 0                | -0.97       |
| African American (n=7,035) | ancestry     | 8                                                  | -0.67            | -0.97       |
| +Female (n=2,789)          | +gender      | 5                                                  | 0                | -1.5        |

817

818 **Table S5: Several co-occurrence and out-of-window p-values identified by PBC.**

819 Every p-value shown below passes a Bonferroni corrected alpha threshold of **1.08e-8**.

820 Each pair of terms exhibits a significant temporal trend as indicated by arrows.

| T1                | T2                     | Comorbid log10 p-value | Out-of-window Direction | Directional log10 p-value |
|-------------------|------------------------|------------------------|-------------------------|---------------------------|
| Milrinone (1,676) | Heart Transplant (122) | 1e-104                 | →                       | 1e-32                     |
| T2D (97,484)      | CKD (15,123)           | 1e-3374                | →                       | 1e-195                    |

|                                        |                                |        |   |         |
|----------------------------------------|--------------------------------|--------|---|---------|
| HIV (2,730)                            | Pneumocystis (203)             | 1e-120 | → | 1e-16   |
| Obesity due to excess calories (26494) | Essential Hypertension (-1299) | 1e-848 | → | 1e-1299 |

821 **Table S7: Citations corresponding to comorbidities discovered by minimum**  
822 **description length clustering.** See Figure S3 for a graphical representation of MDL  
823 clusters.

| Term 1                   | Term 2                  | PubMed ID |
|--------------------------|-------------------------|-----------|
| abruptio placenta        | fetal distress          | 26393335  |
| hyperemesis gravidarum   | preeclampsia            | 23360164  |
| Hodgkins lymphoma        | chemotherapy            | 26541251  |
| pancreatitis             | pancreatic cancer       | 30315287  |
| Chronic asthma           | diabetes                | 30489598  |
| aplastic anemia          | renal failure           | 17426071  |
| allergic reactions       | eye disorders           | 31343437  |
| constipation             | urinary tract infection | 30212423  |
| melanoma                 | Parkinson's disease     | 29991141  |
| HIV                      | osteoporosis            | 25709813  |
| chronic sinusitis        | substance disorder      | 28812909  |
| breech                   | early labor             | 31741046  |
| atrial fibrillation      | emphysema               | 25900353  |
| osteoarthritis           | retinal detachment      | 20462780  |
| schizophrenia            | hypertension            | 27855222  |
| developmental disability | birth trauma            | 31240076  |
| lumbago                  | depression              | 31703727  |

|          |         |          |
|----------|---------|----------|
| migraine | obesity | 27358118 |
|----------|---------|----------|
